# Supplementary material for: Optimization of a modeling platform to predict oncogenes from genome‐scale metabolic networks of non‐small‐cell lung cancers
Source: PubMed Central journal article supplement (PMC8329960; doi:10.1002/2211-5463.13231), 2021-07-20

Figure S6. Survival analysis obtained from the HPA database to explain survival significance of the inferred oncogenes discussed in Table 1 and 2.

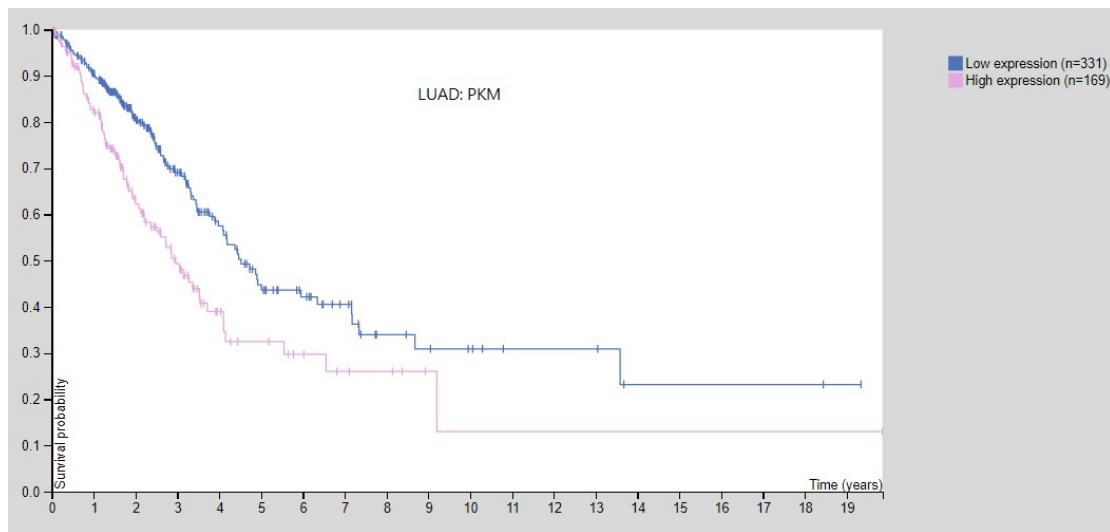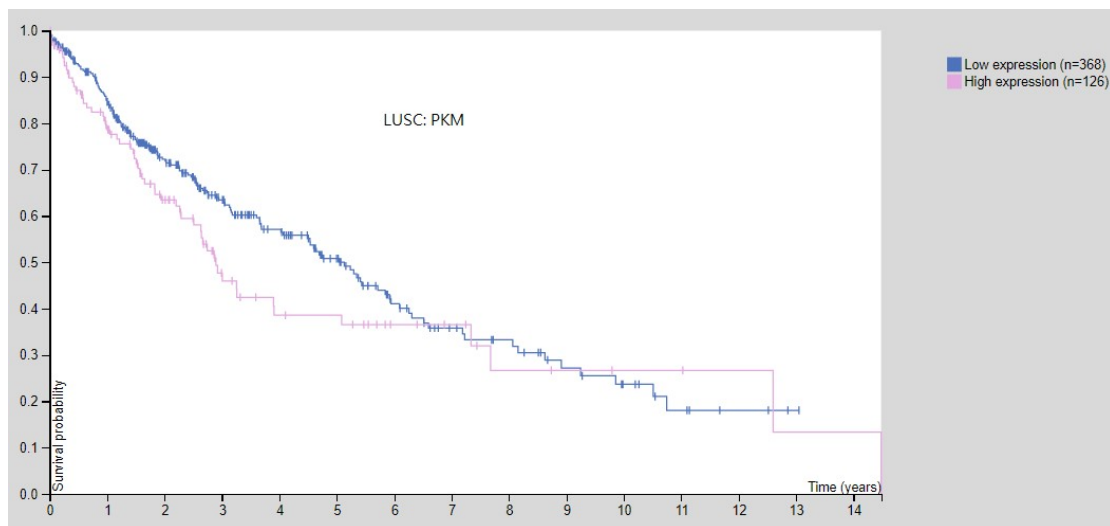

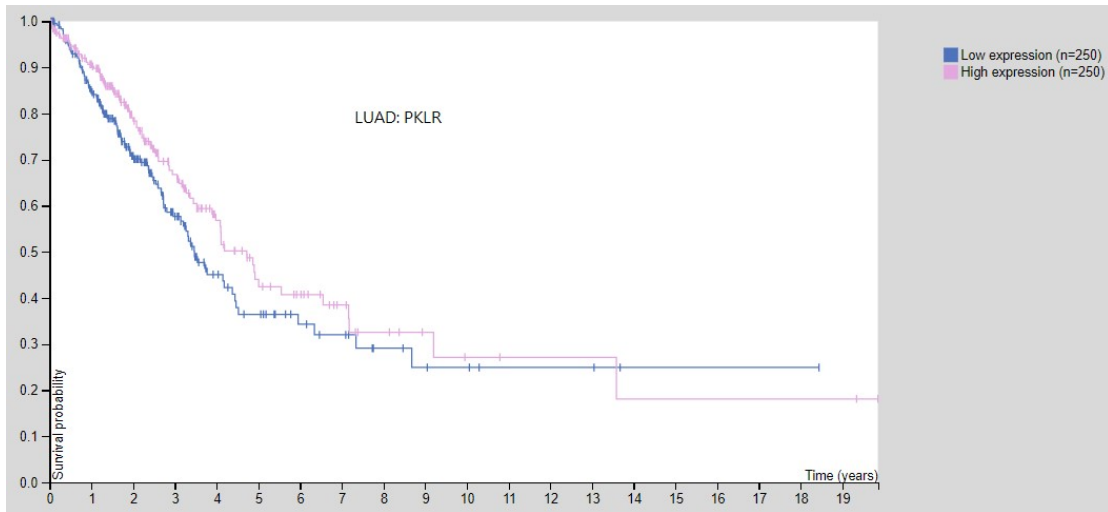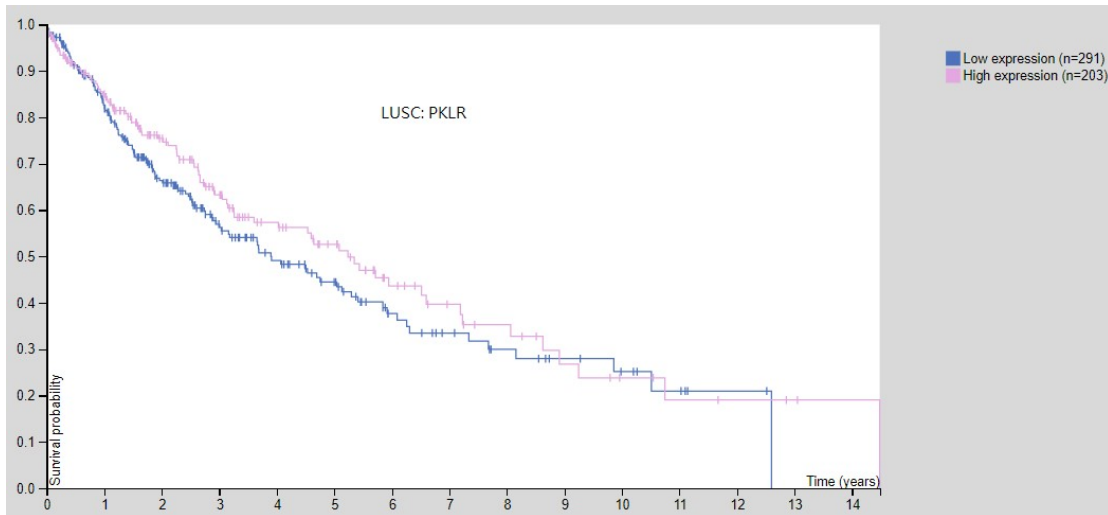

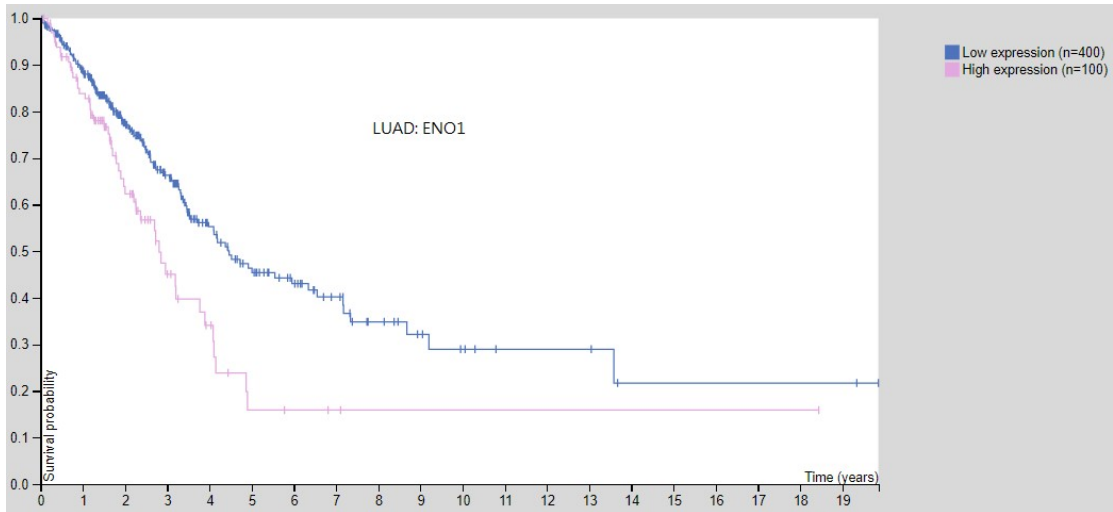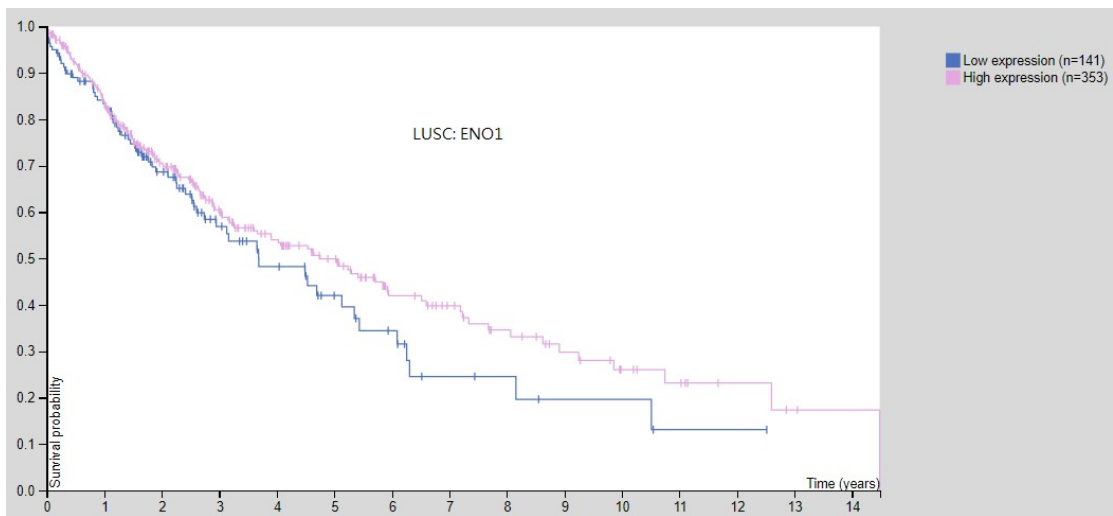

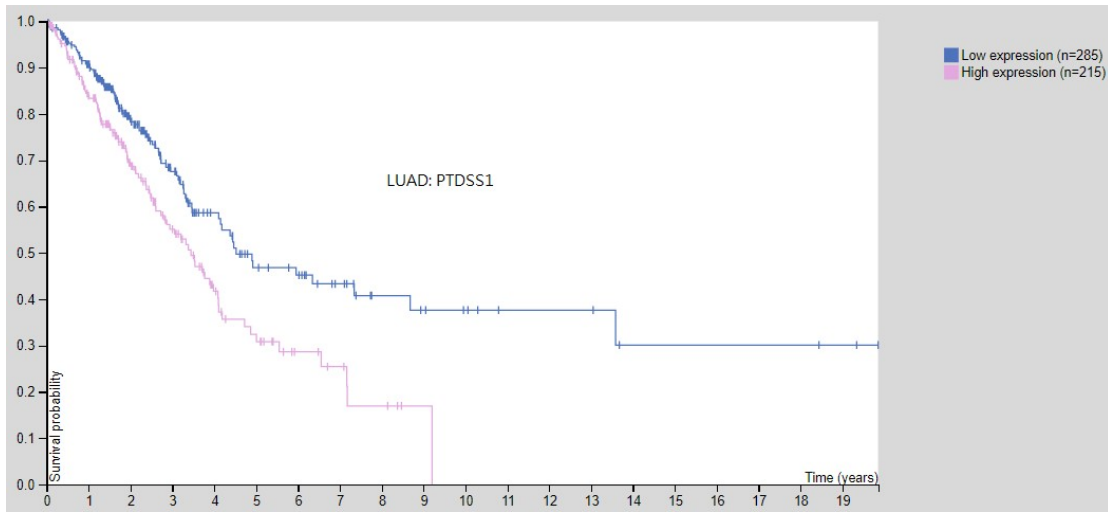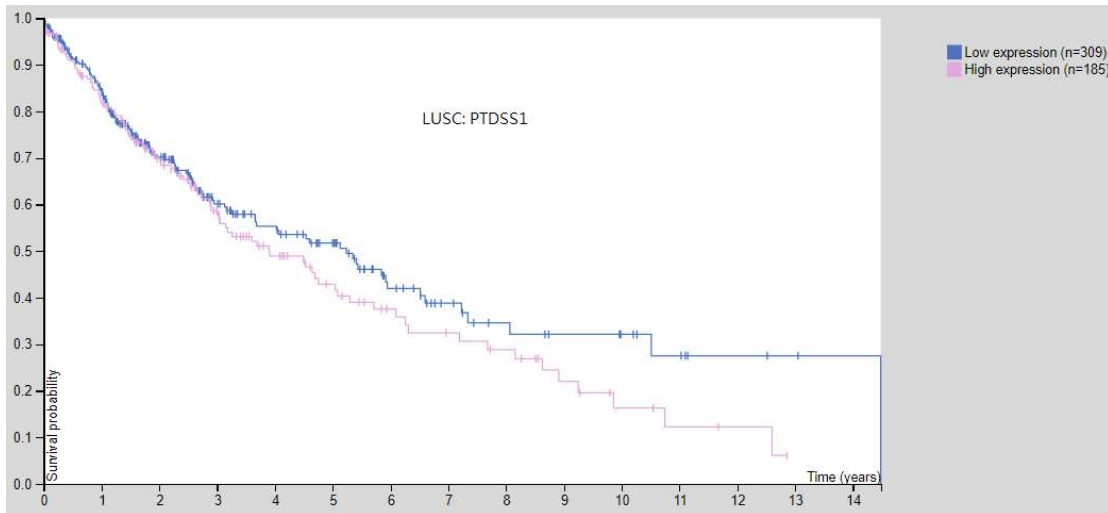

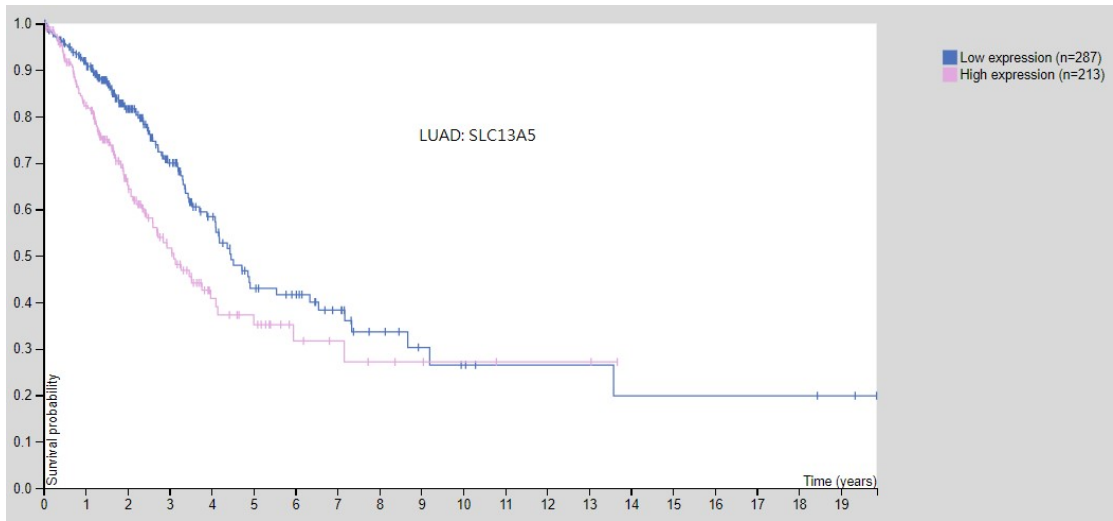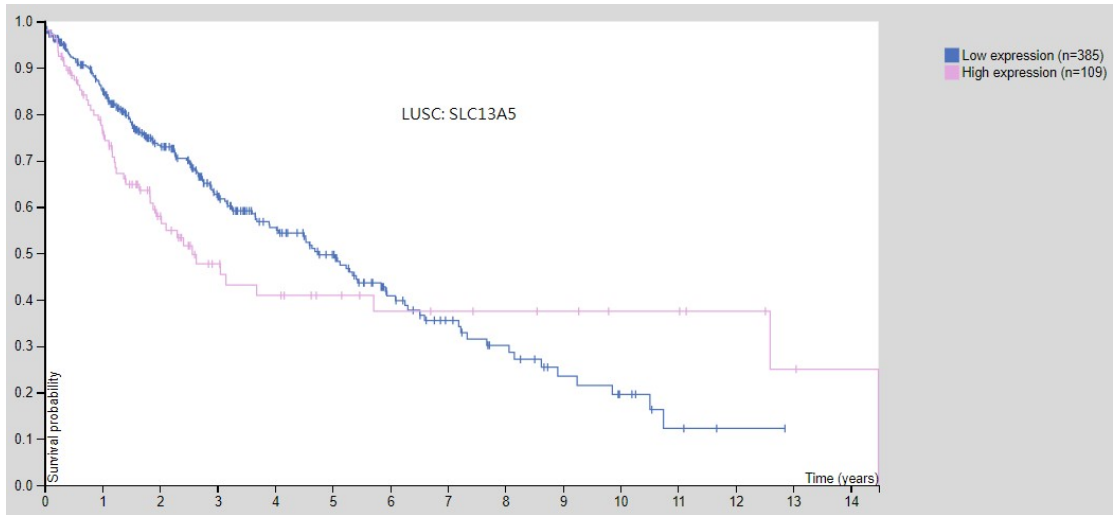

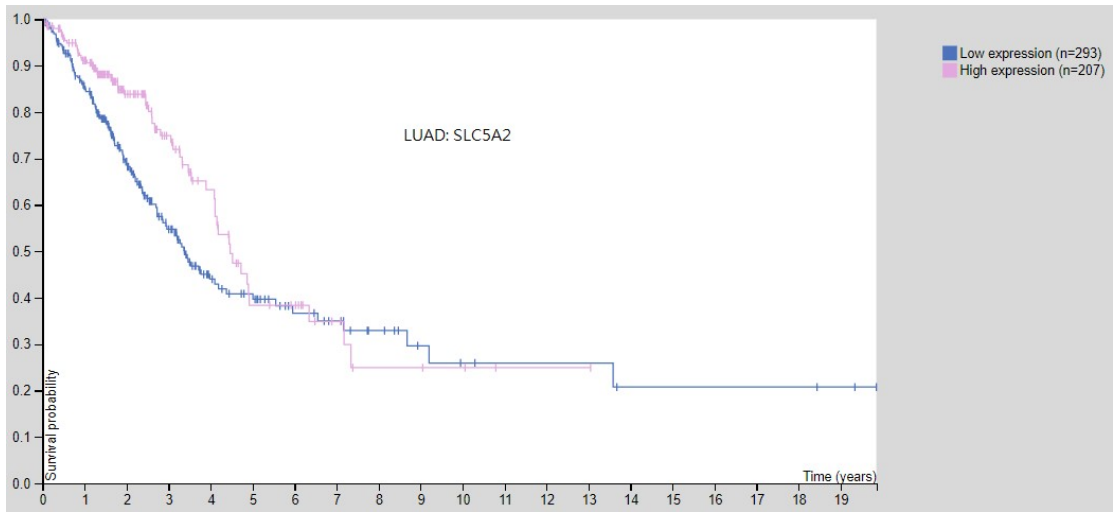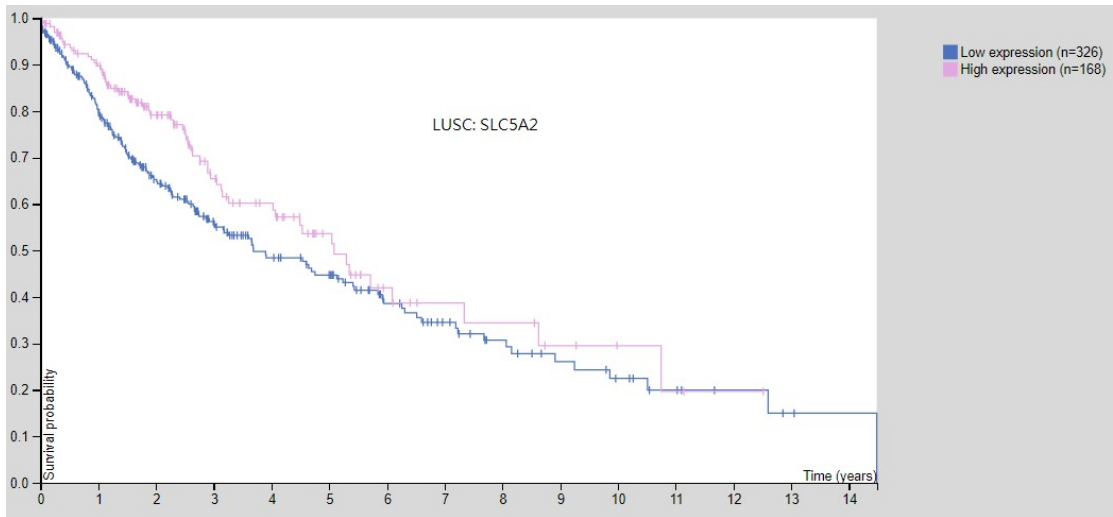

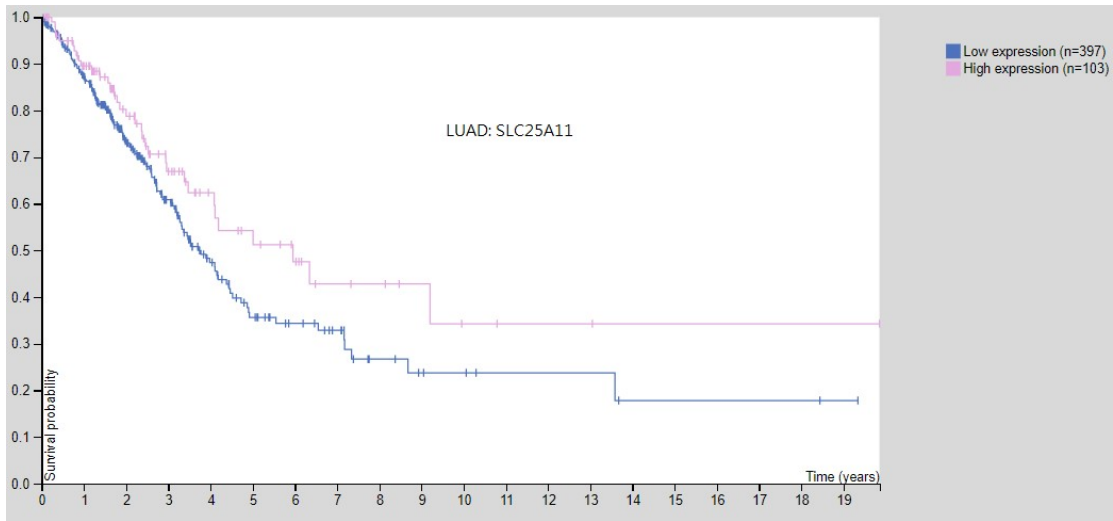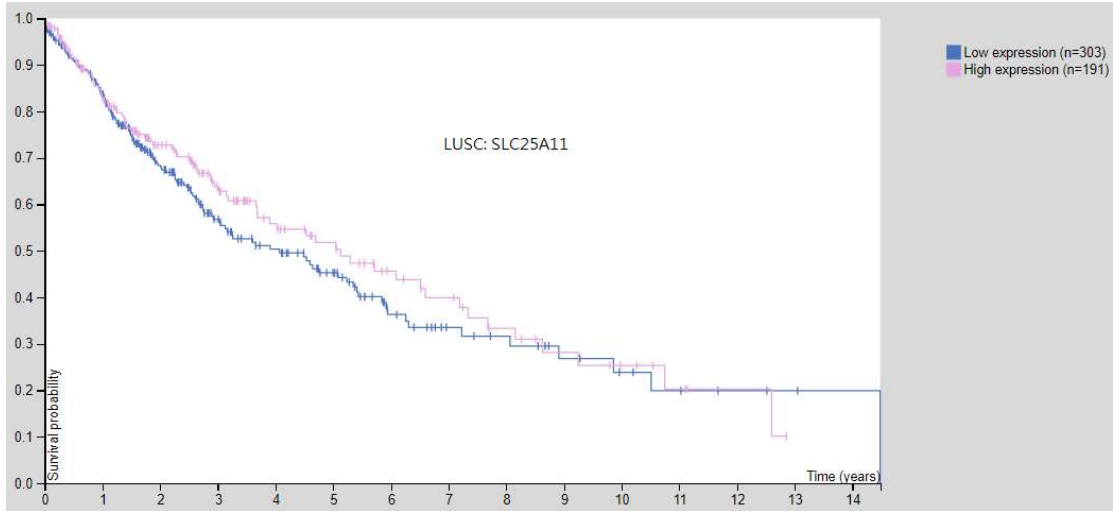

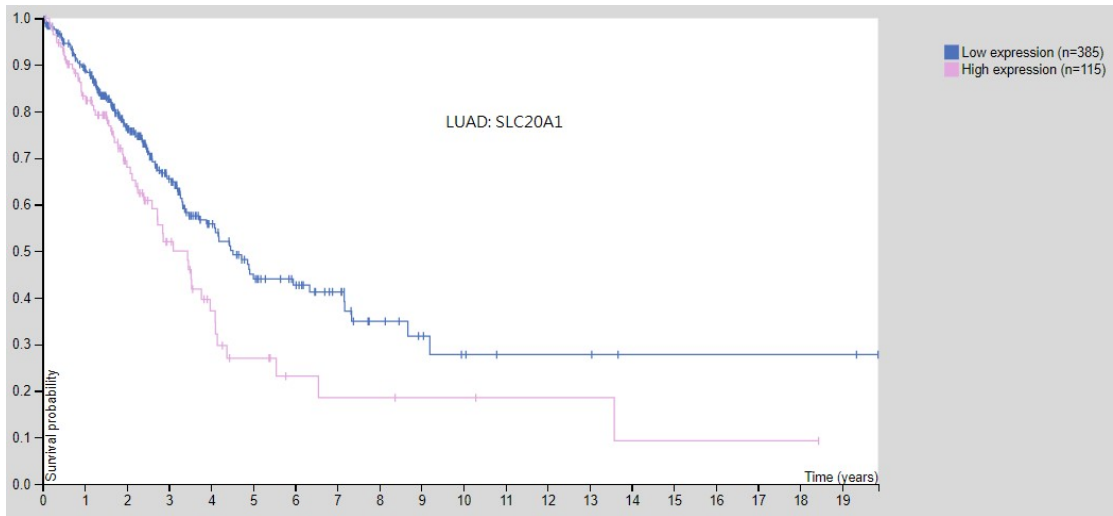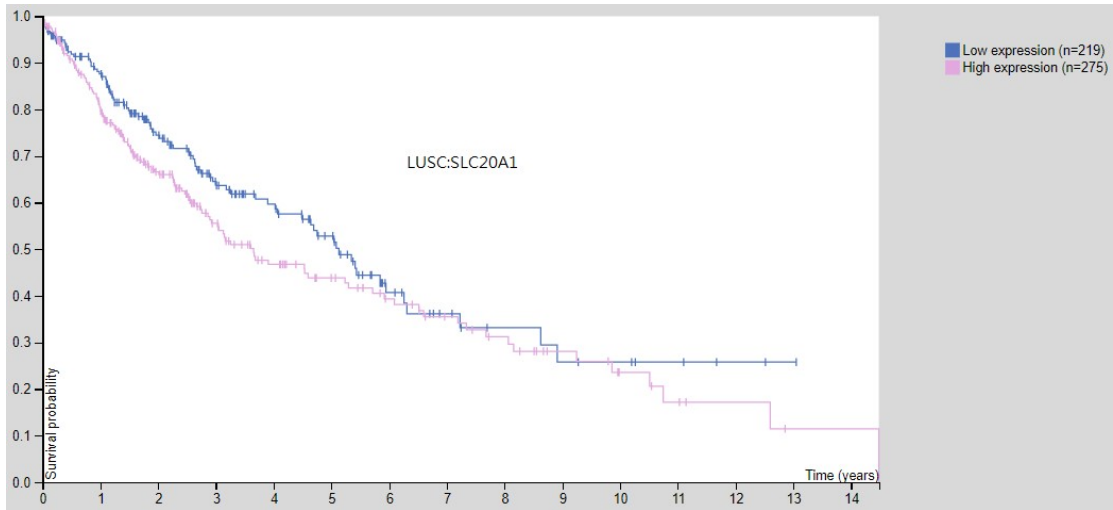



Pathology of SLC22A7 for LUAD is not available.

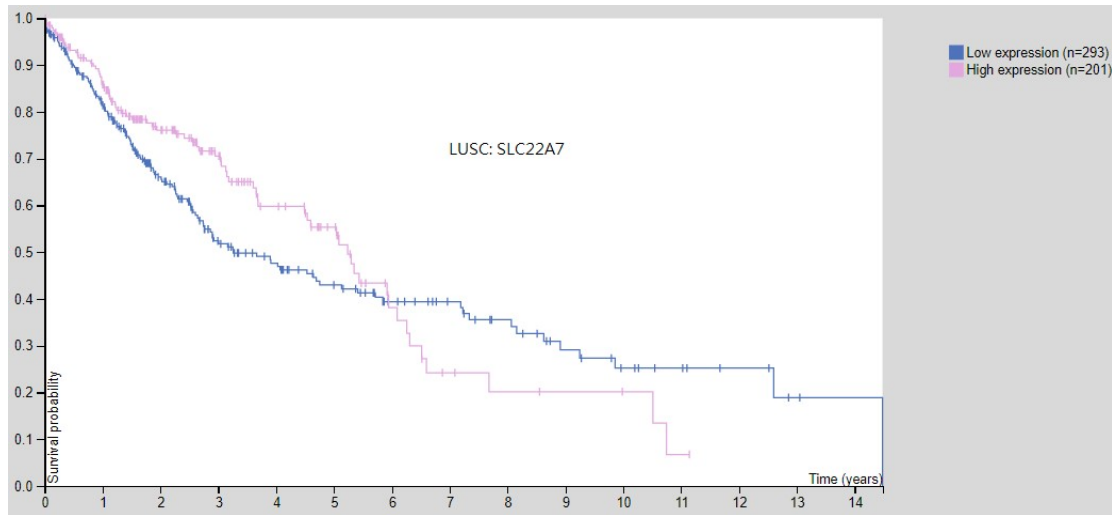

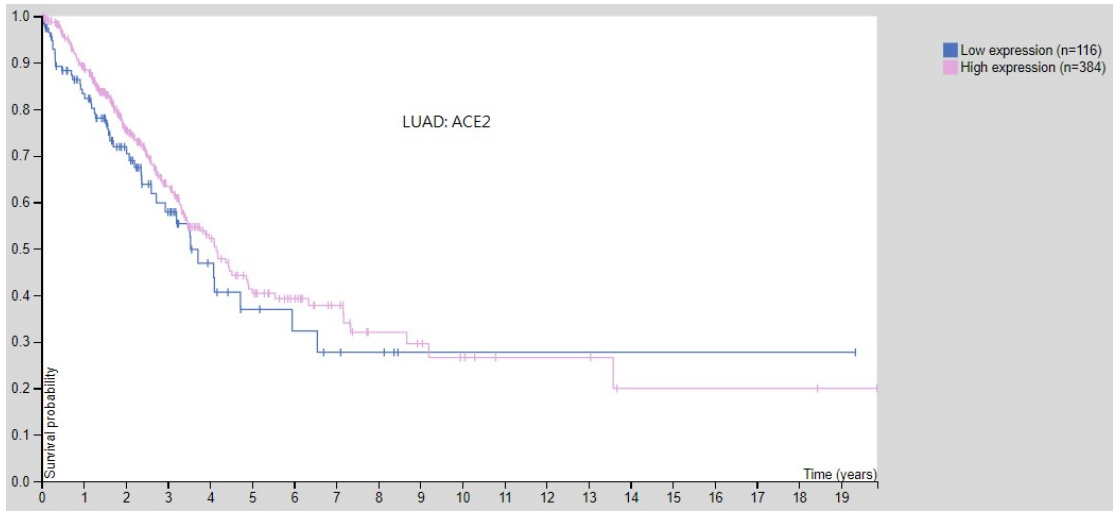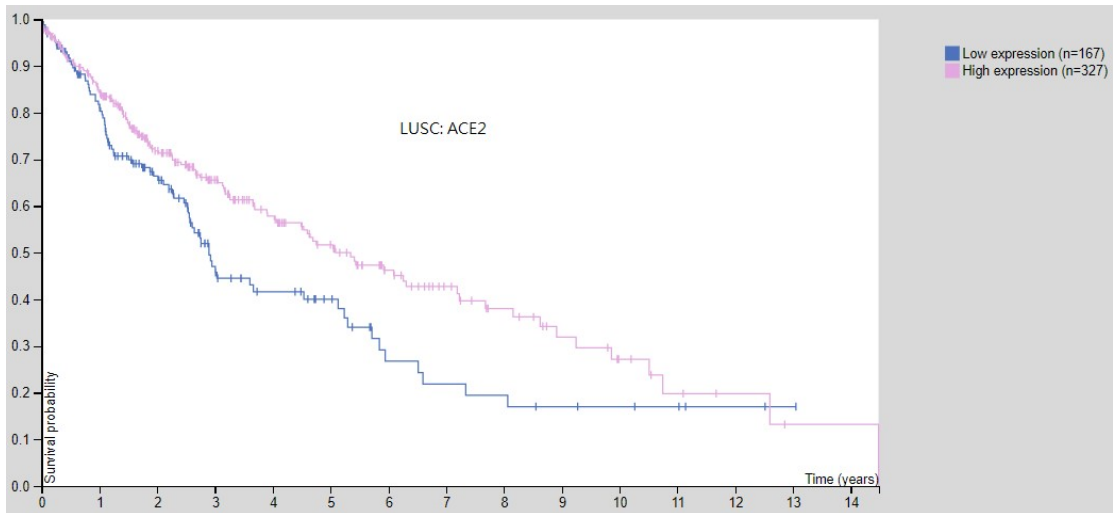

Supplement: FEB4-11-2078-s002.pdf [file FEB4-11-2078-s002.pdf]
