# Supplementary material for: Optimization of a modeling platform to predict oncogenes from genome‐scale metabolic networks of non‐small‐cell lung cancers
Source: PubMed Central journal article supplement (PMC8329960; doi:10.1002/2211-5463.13231), 2021-07-20
Supplement: FEB4-11-2078-s005.pdf [file FEB4-11-2078-s005.pdf]

Metabolite-Flow Variability Analysis  
(MFVA)  
or  
Flux-Sum Variability Analysis (FSVA)

Roadmap for computing fuzzy equal membership grades. It is applied to measure how much closeness for the flux-sum pattern of a mutant to the template

Step (A)

FSVA Problem for Cancer or Basal Cell

$$\begin{cases} \max / \min r_m \\ \zeta \in (0,1] \end{cases}$$

subject to the inner optimization problems:

$$\begin{cases} \text{FBA Problem:} \\ \max_{\mathbf{v}_{f/b}} v_{biomass} \\ \mathbf{N}^{CA/BL}(\mathbf{v}_f - \mathbf{v}_b) = \mathbf{0} \\ v_{f/b,j}^{LB} \leq v_{f/b,j} \leq v_{f/b,j}^{UB} \end{cases} \quad \begin{cases} \text{UFD problem:} \\ \min_{\mathbf{v}_{f/b}} \left( \sum_f v_f^2 + \sum_b v_b^2 \right) \\ \mathbf{N}^{CA/BL}(\mathbf{v}_f - \mathbf{v}_b) = \mathbf{0} \\ v_{f/b,i}^{LB} \leq v_{f/b,i} \leq v_{f/b,i}^{UB} \\ v_{biomass} \geq \zeta v_{biomass}^* \end{cases}$$

FSVA Problem for each mutant

$$\begin{cases} \max / \min r_m \\ \zeta \in (0,1] \end{cases}$$

subject to the inner optimization problems:

$$\begin{cases} \text{FBA Problem:} \\ \max_{\mathbf{v}_{f/b}} v_{biomass} \\ \mathbf{N}(\mathbf{v}_f - \mathbf{v}_b) = \mathbf{0} \\ v_{f/b,i}^{LB,MU} \leq v_{f/b,i} \leq v_{f/b,i}^{UB,MU}, i \in \Omega^{MU} \\ v_{f/b,j}^{LB} \leq v_{f/b,j} \leq v_{f/b,j}^{UB}, j \notin \Omega^{MU} \\ v_{biomass} \geq \zeta v_{biomass}^* \end{cases} \quad \begin{cases} \text{UFD problem:} \\ \min_{\mathbf{v}_{f/b}} \left( \sum_f v_f^2 + \sum_b v_b^2 \right) \\ \mathbf{N}(\mathbf{v}_f - \mathbf{v}_b) = \mathbf{0} \\ v_{f/b,i}^{LB,MU} \leq v_{f/b,i} \leq v_{f/b,i}^{UB,MU}, i \in \Omega^{MU} \\ v_{f/b,j}^{LB} \leq v_{f/b,j} \leq v_{f/b,j}^{UB}, j \notin \Omega^{MU} \end{cases}$$

Step (B)

Minimum/Maximum flux-sum for each metabolite of cancer cell

$$[r_{m,\min}^{CA}, r_{m,\max}^{CA}]$$

Minimum/Maximum flux-sum for each metabolite of basal cell

$$[r_{m,\min}^{BL}, r_{m,\max}^{BL}]$$

Minimum/Maximum flux-sum for each metabolite of a mutant

$$[r_{m,\min}^{MU}, r_{m,\max}^{MU}]_i$$

Step (C)

Differential Expression Flux-Sum of the template

$$[LFC_{m,\min}^{CABL}, LFC_{m,\max}^{CABL}]$$

Categories of Flux-Sum Intervals between Cancer/Normal Model and Mutant/Normal Model

Differential Expression Flux-Sum of each mutant

$$[LFC_{m,\min}^{MUBL}, LFC_{m,\max}^{MUBL}]_i$$

Step (D)

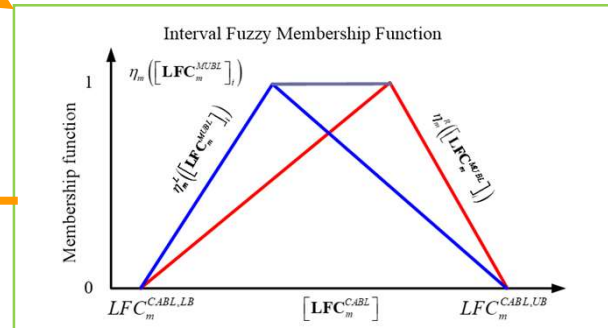

Step (E)

Fuzzy Equal Membership Grade of each mutant

$$[\eta_{m,\min}, \eta_{m,\max}]$$

## Categories of Flux-Sum Intervals between Cancer/Normal Model and Mutant/Normal Model

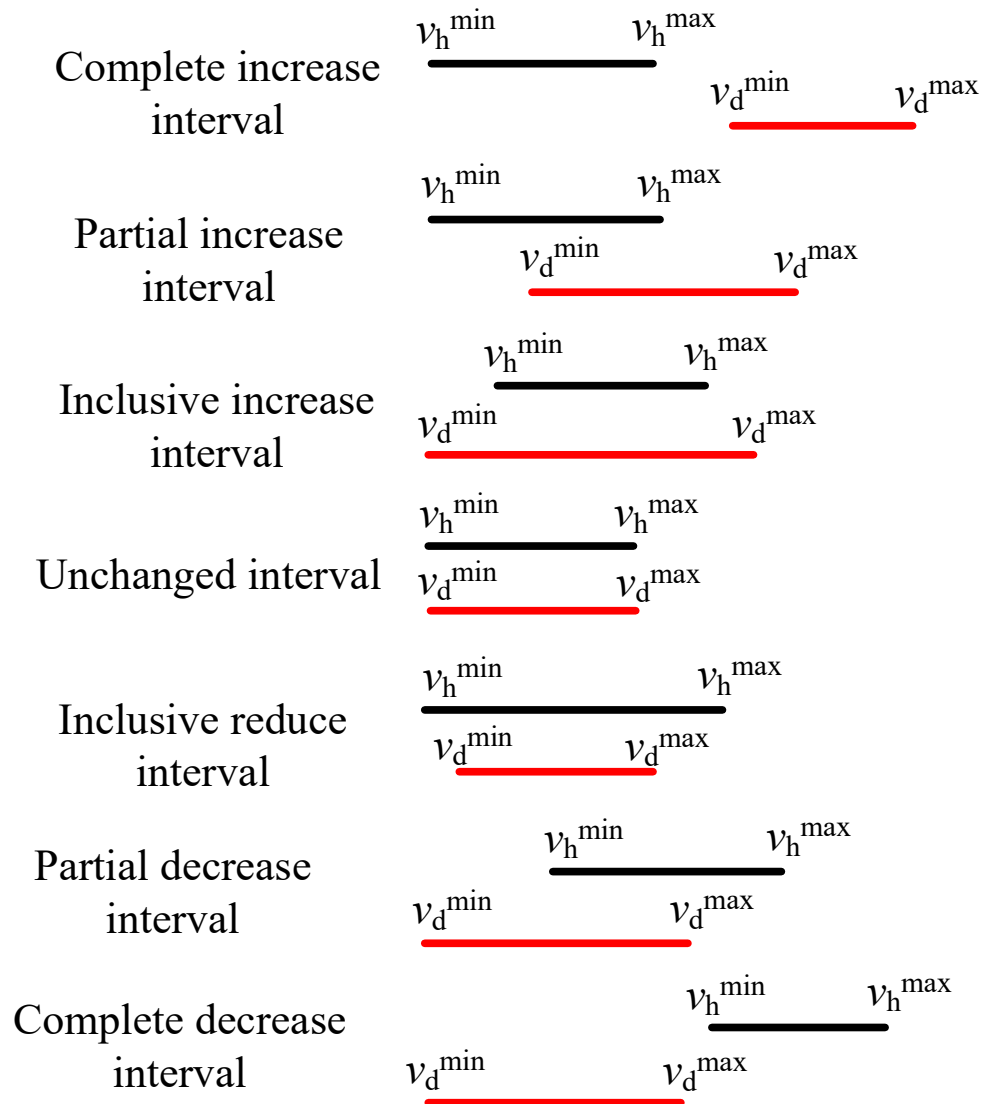

- The black line indicates the flux-sum interval of the normal model, and the red line indicates that of the mutant/cancer model.
- The categories are a qualitative measure to determine the trend of flux change between mutant and normal case, not quantitative.

# Computational Procedures of Fuzzy Equal Membership Grade

- The FSVA problems for the cancer model and basal model in Step (A) are respectively applied to compute the minimum and maximum synthesis rate for each metabolite. Such interval flux-sum are expressed as shown in Step (B):

Minimum/Maximum flux-sum  
for each metabolite of cancer cell:

$$\left[ r_{m,\min}^{CA}, r_{m,\max}^{CA} \right]$$

Minimum/Maximum flux-sum  
for each metabolite of basal cell:

$$\left[ r_{m,\min}^{BL}, r_{m,\max}^{BL} \right]$$

Minimum/Maximum flux-sum for  
each metabolite of the  $i^{th}$  mutant:

$$\left[ r_{m,\min}^{MU}, r_{m,\max}^{MU} \right]_i$$

- Using interval arithmetic, log2 interval fold changes of the template and mutants are computed as shown in Step (C):

Differential Expression Flux-Sum  
of the template:

$$\left[ \mathbf{LFC}_m^{CABL} \right] = \left[ LFC_{m,\min}^{CABL}, LFC_{m,\max}^{CABL} \right]$$

Differential Expression Flux-Sum  
of each mutant:

$$\left[ \mathbf{LFC}_m^{MUBL} \right]_i = \left[ LFC_{m,\min}^{MUBL}, LFC_{m,\max}^{MUBL} \right]_i$$

- The computation and definition of the interval arithmetic are expressed as follows:

# Computation of log2 interval fold changes of the template and mutants

- From Step (B), we have the interval flux-sum of each metabolite for cancer, basal and each mutant

Minimum/Maximum flux-sum  
for each metabolite of cancer cell:

$$\left[ r_{m,\min}^{CA}, r_{m,\max}^{CA} \right]$$

Minimum/Maximum flux-sum  
for each metabolite of basal cell:

$$\left[ r_{m,\min}^{BL}, r_{m,\max}^{BL} \right]$$

Minimum/Maximum flux-sum for  
each metabolite of the  $i^{th}$  mutant:

$$\left[ r_{m,\min}^{MU}, r_{m,\max}^{MU} \right]_i$$

- The interval fold changes of the template and each mutants are computed by interval arithmetic as

The interval fold change of the template:

$$\left[ CABL_{m,\min}, CABL_{m,\max} \right] = \left[ \min \left\{ \frac{r_{m,\min}^{CA}}{r_{m,\min}^{BL}}, \frac{r_{m,\min}^{CA}}{r_{m,\max}^{BL}}, \frac{r_{m,\max}^{CA}}{r_{m,\min}^{BL}}, \frac{r_{m,\max}^{CA}}{r_{m,\max}^{BL}} \right\}, \max \left\{ \frac{r_{m,\min}^{CA}}{r_{m,\min}^{BL}}, \frac{r_{m,\min}^{CA}}{r_{m,\max}^{BL}}, \frac{r_{m,\max}^{CA}}{r_{m,\min}^{BL}}, \frac{r_{m,\max}^{CA}}{r_{m,\max}^{BL}} \right\} \right]$$

The interval fold change of the  $i^{th}$  mutant:

$$\left[ MUBL_{m,\min}, MUBL_{m,\max} \right]_i = \left[ \min \left\{ \frac{r_{m,\min}^{MU}}{r_{m,\min}^{BL}}, \frac{r_{m,\min}^{MU}}{r_{m,\max}^{BL}}, \frac{r_{m,\max}^{MU}}{r_{m,\min}^{BL}}, \frac{r_{m,\max}^{MU}}{r_{m,\max}^{BL}} \right\}, \max \left\{ \frac{r_{m,\min}^{MU}}{r_{m,\min}^{BL}}, \frac{r_{m,\min}^{MU}}{r_{m,\max}^{BL}}, \frac{r_{m,\max}^{MU}}{r_{m,\min}^{BL}}, \frac{r_{m,\max}^{MU}}{r_{m,\max}^{BL}} \right\} \right]_i$$

# Computation of log2 interval fold changes of the template and mutants

- The log2 interval fold changes of the template and each mutant are obtained, respectively, as

Template:

$$[\mathbf{LFC}_m^{CABL}] = [LFC_{m,\min}^{CABL}, LFC_{m,\max}^{CABL}] = \log_2([CABL_{m,\min}, CABL_{m,\max}]) = [\log_2(CABL_{m,\min}), \log_2(CABL_{m,\max})]$$

$i^{th}$  mutant:

$$[\mathbf{LFC}_m^{MUBL}]_i = [LFC_{m,\min}^{MUBL}, LFC_{m,\max}^{MUBL}]_i = \log_2([MUBL_{m,\min}, MUBL_{m,\max}]_i) = [\log_2(MUBL_{m,\min}), \log_2(MUBL_{m,\max})]_i$$

- Define the interval fuzzy membership function to be applied as a quantitative measure to determine how closeness of the mutant interval fold changes to the template.

The user provides the lower and upper bounds of the left and right membership function:

$$LFC_{m,LB} = \begin{cases} LFC_{m,\min}^{CABL} / \delta, LFC_{m,\min}^{CABL} \geq 0 \\ \delta LFC_{m,\min}^{CABL}, LFC_{m,\min}^{CABL} < 0 \end{cases}$$

$$LFC_{m,UB} = \begin{cases} LFC_{m,\max}^{CABL} / \delta, LFC_{m,\max}^{CABL} \leq 0 \\ \delta LFC_{m,\max}^{CABL}, LFC_{m,\max}^{CABL} > 0 \end{cases}$$

where  $\delta = 4$

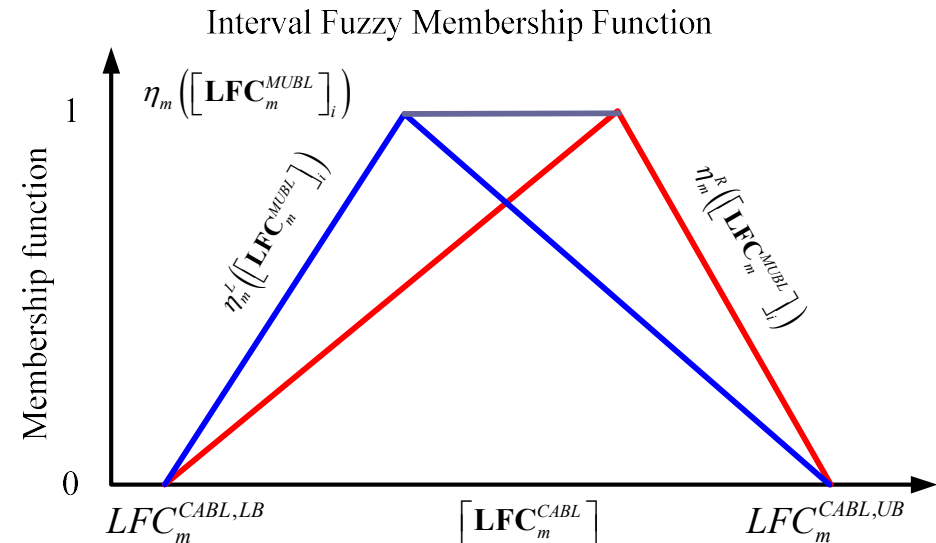

# Evaluation of Interval Fuzzy Equal Membership Grade for each Mutant to the Template

- The interval left and right membership functions are defined as follows:

Interval left membership function,  $[\eta_m^L]_i$ :

$$[\eta_m^L]_i = [\eta_{m,\min}^L, \eta_{m,\max}^L]_i = \frac{[\mathbf{LFC}_m^{MUBL}]_i - LFC_{m,LB}}{[\mathbf{LFC}_m^{CABL}] - LFC_{m,LB}}$$

Interval right membership function,  $[\eta_m^R]_i$ :

$$[\eta_m^R]_i = [\eta_{m,\min}^R, \eta_{m,\max}^R]_i = \frac{LFC_{m,UB} - [\mathbf{LFC}_m^{MUBL}]_i}{LFC_{m,UB} - [\mathbf{LFC}_m^{CABL}]}$$

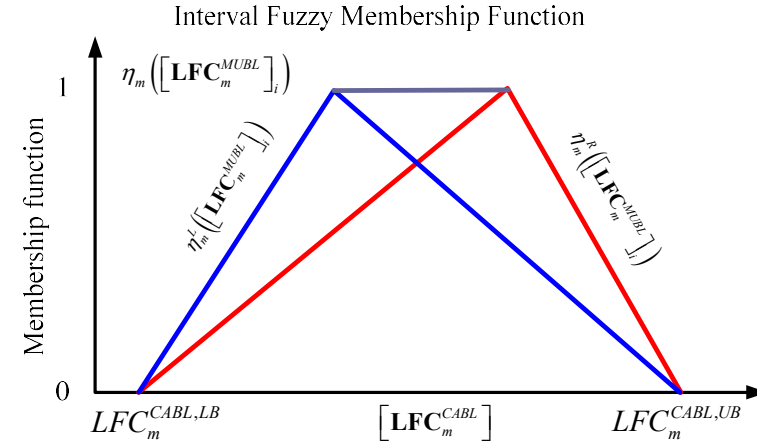

- The minimum and maximum values of interval left and right membership functions are computed by interval arithmetic as follows:

$$[\eta_{m,\min}^L, \eta_{m,\max}^L]_i = \left[ \begin{array}{l} \min \left\{ \frac{(LFC_{m,\min}^{MUBL} - LFC_{m,LB})}{(LFC_{m,\min}^{CABL} - LFC_{m,LB})}, \frac{(LFC_{m,\min}^{MUBL} - LFC_{m,LB})}{(LFC_{m,\max}^{CABL} - LFC_{m,LB})}, \frac{(LFC_{m,\max}^{MUBL} - LFC_{m,LB})}{(LFC_{m,\min}^{CABL} - LFC_{m,LB})}, \frac{(LFC_{m,\max}^{MUBL} - LFC_{m,LB})}{(LFC_{m,\max}^{CABL} - LFC_{m,LB})} \right\}, \\ \max \left\{ \frac{(LFC_{m,\min}^{MUBL} - LFC_{m,LB})}{(LFC_{m,\min}^{CABL} - LFC_{m,LB})}, \frac{(LFC_{m,\min}^{MUBL} - LFC_{m,LB})}{(LFC_{m,\max}^{CABL} - LFC_{m,LB})}, \frac{(LFC_{m,\max}^{MUBL} - LFC_{m,LB})}{(LFC_{m,\min}^{CABL} - LFC_{m,LB})}, \frac{(LFC_{m,\max}^{MUBL} - LFC_{m,LB})}{(LFC_{m,\max}^{CABL} - LFC_{m,LB})} \right\} \end{array} \right],$$

$$[\eta_{m,\min}^R, \eta_{m,\max}^R]_i = \left[ \begin{array}{l} \min \left\{ \frac{(LFC_{m,UB} - LFC_{m,\min}^{MUBL})}{(LFC_{m,UB} - LFC_{m,\min}^{CABL})}, \frac{(LFC_{m,UB} - LFC_{m,\min}^{MUBL})}{(LFC_{m,UB} - LFC_{m,\max}^{CABL})}, \frac{(LFC_{m,UB} - LFC_{m,\max}^{MUBL})}{(LFC_{m,UB} - LFC_{m,\min}^{CABL})}, \frac{(LFC_{m,UB} - LFC_{m,\max}^{MUBL})}{(LFC_{m,UB} - LFC_{m,\max}^{CABL})} \right\}, \\ \max \left\{ \frac{(LFC_{m,UB} - LFC_{m,\min}^{MUBL})}{(LFC_{m,UB} - LFC_{m,\min}^{CABL})}, \frac{(LFC_{m,UB} - LFC_{m,\min}^{MUBL})}{(LFC_{m,UB} - LFC_{m,\max}^{CABL})}, \frac{(LFC_{m,UB} - LFC_{m,\max}^{MUBL})}{(LFC_{m,UB} - LFC_{m,\min}^{CABL})}, \frac{(LFC_{m,UB} - LFC_{m,\max}^{MUBL})}{(LFC_{m,UB} - LFC_{m,\max}^{CABL})} \right\} \end{array} \right]$$

# Evaluation of Interval Fuzzy Equal Membership Grade for each Mutant to the Template

- The interval membership grade for each metabolite of the  $i^{\text{th}}$  mutant is defined as

$$\begin{aligned} [\boldsymbol{\eta}_m]_i &= \left[ \max \left\{ \min \left\{ ([\boldsymbol{\eta}_m^L], [\boldsymbol{\eta}_m^R], 1) \right\}, 0 \right\}, 0 \right] \\ &= [\eta_{m,\min}, \eta_{m,\max}] \\ &= \left[ \begin{array}{l} \max \left\{ \min (\eta_{m,\min}^L, \eta_{m,\min}^R, 1), 0 \right\}, \\ \max \left\{ \min (\eta_{m,\max}^L, \eta_{m,\max}^R, 1), 0 \right\} \end{array} \right] \end{aligned}$$

- The interval decision grade for the genome-scale metabolic net of the  $i^{\text{th}}$  mutant is defined as

$$[\boldsymbol{\eta}_E]_i = [\eta_{E,\min}, \eta_{E,\max}]_i = \left[ \frac{1}{M} \sum_{m=1}^M \eta_{m,\min}, \frac{1}{M} \sum_{m=1}^M \eta_{m,\max} \right]_i$$

- The interval decision grade can be applied as a quantitative measure to determine how much closeness of each mutant to the template.
- The center and radius of the interval decision grade are defined as

$$\text{Center} = \frac{\eta_{E,\min} + \eta_{E,\max}}{2}$$

$$\text{Radius} = \frac{\eta_{E,\max} - \eta_{E,\min}}{2}$$



# Definition of Computation of Interval Numbers

- Suppose that two intervals,  $[C] = [C_{\min}, C_{\max}]$  and  $[B] = [B_{\min}, B_{\max}]$
- Subtraction:  $[C] - [B] = [C_{\min} - B_{\max}, C_{\max} - B_{\min}]$
- Addition:  $[C] + [B] = [C_{\min} + B_{\min}, C_{\max} + B_{\max}]$
- Multiplication:  $[C] * [B] = \left[ \begin{array}{l} \min \{ C_{\min} B_{\min}, C_{\min} B_{\max}, C_{\max} B_{\min}, C_{\max} B_{\max} \}, \\ \max \{ C_{\min} B_{\min}, C_{\min} B_{\max}, C_{\max} B_{\min}, C_{\max} B_{\max} \} \end{array} \right]$
- Division:  $[C] / [B] = \left[ \begin{array}{l} \min \{ C_{\min} / B_{\min}, C_{\min} / B_{\max}, C_{\max} / B_{\min}, C_{\max} / B_{\max} \}, \\ \max \{ C_{\min} / B_{\min}, C_{\min} / B_{\max}, C_{\max} / B_{\min}, C_{\max} / B_{\max} \} \end{array} \right], 0 \notin [B]$

1. Arnold Kaufmann and Madan M. Guda, Introduction to Fuzzy Arithmetic: Theory and Application, Van Nostrand Reinhold, 1991
2. Eduardo Massad, Laécio Carvalho de Barr, Neli Regina Siqueira Ortega and Claudio José Struchiner, Fuzzy Logic in Action: Applications in Epidemiology and Beyond, Springer, 2008
3. Hang Zettervall, Fuzzy set theory applied to make medical prognoses for cancer patients, Doctoral Dissertation, Blekinge Institute of Technology, Sweden, 2014

## Example: Evaluation of Interval Membership Grades

- Suppose that a toy metabolic network consisted of 7 metabolites, and their synthesis rates for the normal model, cancer model and two mutant models are computed by FSVA

| Flux Pattern by FSVA |             |             |             |             |               |               |               |               |
|----------------------|-------------|-------------|-------------|-------------|---------------|---------------|---------------|---------------|
|                      | Basal       |             | Cancer      |             | Mutant 1      |               | Mutant 2      |               |
|                      | $BL_{\min}$ | $BL_{\max}$ | $CA_{\min}$ | $CA_{\max}$ | $MU_{1,\min}$ | $MU_{1,\max}$ | $MU_{2,\min}$ | $MU_{2,\max}$ |
| Metabolite 1         | 0.5         | 1           | 1.5         | 3           | 1.2           | 2.4           | 1             | 1.5           |
| Metabolite 2         | 0.2         | 1.2         | 0.5         | 2           | 0.4           | 2.2           | 0.2           | 2             |
| Metabolite 3         | 0.4         | 0.8         | 0.4         | 1.5         | 0.4           | 1.2           | 0.4           | 1             |
| Metabolite 4         | 0.5         | 0.9         | 0.5         | 0.8         | 0.5           | 0.9           | 0.4           | 0.8           |
| Metabolite 5         | 0.4         | 0.8         | 0.2         | 0.8         | 0.1           | 0.8           | 0.5           | 1             |
| Metabolite 6         | 0.2         | 1.2         | 0.1         | 1           | 0.1           | 1.1           | 0.5           | 1.2           |
| Metabolite 7         | 1           | 2           | 0.2         | 0.8         | 0.2           | 0.8           | 1             | 2             |

- Numerical example for log2 interval fold changes of the template and mutants:

Template:

$$\left[ \mathbf{LFC}_m^{CABL} \right] = \left[ LFC_{m,\min}^{CABL}, LFC_{m,\max}^{CABL} \right] = \log_2 \left( \left[ CABL_{m,\min}, CABL_{m,\max} \right] \right) = \left[ \log_2 \left( CABL_{m,\min} \right), \log_2 \left( CABL_{m,\max} \right) \right]$$

$i^{th}$  mutant:

$$\left[ \mathbf{LFC}_m^{MUBL} \right]_i = \left[ LFC_{m,\min}^{MUBL}, LFC_{m,\max}^{MUBL} \right]_i = \log_2 \left( \left[ MUBL_{m,\min}, MUBL_{m,\max} \right]_i \right) = \left[ \log_2 \left( MUBL_{m,\min} \right), \log_2 \left( MUBL_{m,\max} \right) \right]_i$$

|              | Template              |                       | Mutant 1              |                       | Mutant 2              |                       |
|--------------|-----------------------|-----------------------|-----------------------|-----------------------|-----------------------|-----------------------|
|              | $LFC_{m,\min}^{CABL}$ | $LFC_{m,\max}^{CABL}$ | $LFC_{m,\min}^{MUBL}$ | $LFC_{m,\max}^{MUBL}$ | $LFC_{m,\min}^{MUBL}$ | $LFC_{m,\max}^{MUBL}$ |
| Metabolite 1 | 0.585                 | 2.585                 | 0.263                 | 2.263                 | 0                     | 1.585                 |
| Metabolite 2 | -1.263                | 3.3219                | -1.585                | 3.4594                | -2.585                | 3.3219                |
| Metabolite 3 | -1                    | 1.9069                | -1                    | 1.585                 | -1                    | 1.3219                |
| Metabolite 4 | -0.848                | 0.6781                | -0.848                | 0.848                 | -1.1699               | 0.6781                |
| Metabolite 5 | -2                    | 1                     | -3                    | 1                     | -0.6781               | 1.3219                |
| Metabolite 6 | -3.585                | 2.3219                | -3.585                | 2.4594                | -1.263                | 2.585                 |
| Metabolite 7 | -3.3219               | -0.3219               | -3.3219               | -0.3219               | -1                    | 1                     |

# The lower and upper bound of membership functions

The user provides the lower and upper bounds of the left and right membership function:

$$LFC_{m, LB} = \begin{cases} LFC_{m, \min}^{CABL} / \delta, LFC_{m, \min}^{CABL} \geq 0 \\ \delta LFC_{m, \min}^{CABL}, LFC_{m, \min}^{CABL} < 0 \end{cases}$$

$$LFC_{m, UB} = \begin{cases} LFC_{m, \max}^{CABL} / \delta, LFC_{m, \max}^{CABL} \leq 0 \\ \delta LFC_{m, \max}^{CABL}, LFC_{m, \max}^{CABL} > 0 \end{cases}$$

where  $\delta = 2$

|              | $LFC_{m, LB}$ | $LFC_{m, \min}^{CABL}$ | $LFC_{m, \max}^{CABL}$ | $LFC_{m, UB}$ |
|--------------|---------------|------------------------|------------------------|---------------|
| Metabolite 1 | 0.293         | 0.585                  | 2.585                  | 5.17          |
| Metabolite 2 | -2.526        | -1.263                 | 3.322                  | 6.644         |
| Metabolite 3 | -2            | -1                     | 1.907                  | 3.814         |
| Metabolite 4 | -1.696        | -0.848                 | 0.848                  | 1.696         |
| Metabolite 5 | -4            | -2                     | 1                      | 2             |
| Metabolite 6 | -13.814       | -6.907                 | 2.322                  | 4.644         |
| Metabolite 7 | -6.644        | -3.322                 | -0.322                 | -0.161        |

- Numerical example for interval membership function values of mutants:

Interval left membership function,  $[\eta_m^L]_i$ :

$$[\eta_m^L]_i = [\eta_{m,\min}^L, \eta_{m,\max}^L]_i = \frac{[\text{LFC}_m^{\text{MUBL}}]_i - \text{LFC}_{m,\text{LB}}}{[\text{LFC}_m^{\text{CABL}}] - \text{LFC}_{m,\text{LB}}}$$

Interval right membership function,  $[\eta_m^R]_i$ :

$$[\eta_m^R]_i = [\eta_{m,\min}^R, \eta_{m,\max}^R]_i = \frac{\text{LFC}_{m,\text{UB}} - [\text{LFC}_m^{\text{MUBL}}]_i}{\text{LFC}_{m,\text{UB}} - [\text{LFC}_m^{\text{CABL}}]}$$

|              | Mutant 1          |                   |                   |                   | Mutant 2          |                   |                   |                   |
|--------------|-------------------|-------------------|-------------------|-------------------|-------------------|-------------------|-------------------|-------------------|
|              | $\eta_{m,\min}^L$ | $\eta_{m,\max}^L$ | $\eta_{m,\min}^R$ | $\eta_{m,\max}^R$ | $\eta_{m,\min}^L$ | $\eta_{m,\max}^L$ | $\eta_{m,\min}^R$ | $\eta_{m,\max}^R$ |
| Metabolite 1 | -0.1007           | 6.7374            | 0.634             | 1.8982            | -1                | 4.419             | 0.7819            | 2                 |
| Metabolite 2 | 0.1609            | 4.739             | 0.4027            | 2.4771            | -0.0466           | 4.6301            | 0.4201            | 2.7782            |
| Metabolite 3 | 0.256             | 3.585             | 0.463             | 2.5244            | 0.256             | 3.3219            | 0.5176            | 2.5244            |
| Metabolite 4 | 0.3572            | 3                 | 0.2305            | 3.2506            | 0.2216            | 2.7996            | 0.3076            | 3.7254            |
| Metabolite 5 | 0.2               | 2.5               | 0.25              | 5                 | 0.6644            | 2.661             | 0.1695            | 2.6781            |
| Metabolite 6 | 0.3777            | 2.686             | 0.2655            | 3.544             | 0.6223            | 2.7211            | 0.2502            | 2.544             |
| Metabolite 7 | 0.5255            | 1.9031            | 0.0509            | 19.6377           | 0.8927            | 2.301             | -7.2126           | 5.2126            |

- The interval membership grade for each metabolite

$$\begin{aligned}
 [\eta_{mn}]_i &= \left[ \max \left\{ \min \left\{ ([\eta_m^L], [\eta_m^R], 1) \right\}, 0 \right\} \right] \\
 &= [\eta_{m,\min}, \eta_{m,\max}] \\
 &= \left[ \begin{array}{l} \max \left\{ \min (\eta_{m,\min}^L, \eta_{m,\min}^R, 1), 0 \right\}, \\ \max \left\{ \min (\eta_{m,\max}^L, \eta_{m,\max}^R, 1), 0 \right\} \end{array} \right]
 \end{aligned}$$

|              | Mutant 1        |                 | Mutant 2        |                 |
|--------------|-----------------|-----------------|-----------------|-----------------|
|              | $\eta_{m,\min}$ | $\eta_{m,\max}$ | $\eta_{m,\min}$ | $\eta_{m,\max}$ |
| Metabolite 1 | 0               | 1               | 0               | 1               |
| Metabolite 2 | 0.1609          | 1               | 0               | 1               |
| Metabolite 3 | 0.256           | 1               | 0.256           | 1               |
| Metabolite 4 | 0.2305          | 1               | 0.2216          | 1               |
| Metabolite 5 | 0.2             | 1               | 0.1695          | 1               |
| Metabolite 6 | 0.2655          | 1               | 0.2502          | 1               |
| Metabolite 7 | 0.0509          | 1               | 0               | 1               |
| $[\eta_E]_i$ | 0.1663          | 1               | 0.1282          | 1               |
| Center       | 0.5831          |                 | 0.5641          |                 |
| Radius       | 0.4169          |                 | 0.4359          |                 |

$$\begin{aligned}
 [\eta_E]_i &= [\eta_{E,\min}, \eta_{E,\max}]_i \\
 &= \left[ \frac{1}{M} \sum_{m=1}^M \eta_{m,\min}, \frac{1}{M} \sum_{m=1}^M \eta_{m,\max} \right]_i
 \end{aligned}$$

$$\text{Center} = \frac{\eta_{E,\min} + \eta_{E,\max}}{2}$$

$$\text{Radius} = \frac{\eta_{E,\max} - \eta_{E,\min}}{2}$$
